# Supplementary material
Source: PubMed Central journal article supplement (PMC1316286)
Supplement: bj3920475add.pdf [file bj3920475add.pdf]

Supplementary online material for : An AU-rich stem-loop structure is a critical feature of the perinuclear localisation signal of *c-myc* mRNA ( Hervé Chabanon, Ian Mickleburgh, Brian Burtle, Christopher Pedder and John Hesketh<sup>\*)</sup>

Table: Sequences of the oligonucleotides used

Oligonucleotide 1

**5'-GCAATCCCCCAAACAGACA-3'**

Oligonucleotide 2

**5'-TTTTAAGATTTTTTTAAAAACAATTAATACAAATCTGTT  
AAAATCAGTGGTATTTGTGAGCC-3'**

Oligonucleotide 3

**5'-GGGGTACCGCAATCCCCCAAACAGACA-3'**

Oligonucleotide 4

**5'-GGGTCTAGATTTTAAGATTTTTTTAAAAAAC-3'**

Oligonucleotide 5

**5'-CTAGTTTTAACAGATTTGTATTTAATTGGTTAAAAAATCTTAAAA-3'**

Oligonucleotide 6

**5'-CTAGTTTTAAGATTTTTTTAACCAATTAATACAAATCTGTTAAAA-3'**

Oligonucleotide 7

**5'-CTAGTTTTAACAGATTTATTGTTTTTTAAATCTTAAAA-3'**

Oligonucleotide 8

**5'-CTAGTTTTAAGATTTAAAAACAATAAATCTGTTAAAA-3'**

Oligonucleotide 9

**5'-GCCATCGATGGTCAGTGGTATTTGT-3'**

Oligonucleotide 10

**5'-TGAGCGCGCGTA ATACG-3'**

Oligonucleotide 11

**5'-CCAAGCGCGCAATTAAC-3'**

Oligonucleotide 12

**5'-TAATACGACTCACTATAGGGCTGTCTCATCTTTGGC-3'<sup>(a)</sup>**

Oligonucleotide 13

**5'-CTAGGCATCGATGGTCAG-3'**

Oligonucleotide 14

**5'-TAATACGACTCACTATAGGGTGACACCTGAGAGCTGG-3'<sup>(a)</sup>**

Oligonucleotide 15

**5'-AGATACAATCCAGCACCAGG-3'**

<sup>(a)</sup>Sequence of the T7 promoter is underlined.
